# Supplementary material for: Design of Experiments-Based Optimization of Flavonoids Extraction from Daphne genkwa Flower Buds and Flavonoids Contents at Different Blooming Stages
Source: MDPI journal article supplement (doi:10.3390/plants11070925), 2022-03-29
Supplement: s1 [file s1]

# Design of Experiments-based Optimization of Flavonoids Extraction from *Daphne genkwa* Flower Buds and Flavonoids Contents at different Blooming Stages

Min Kyoung Kim <sup>1</sup>, Geonha Park <sup>2</sup>, Yura Ji <sup>2</sup>, Yun Gyo Lee <sup>3</sup>, Minsik Choi <sup>3</sup>, Seung Hyeon Go <sup>3</sup>,  
Miwon Son <sup>4</sup> and Young Pyo Jang <sup>2,3,5,\*</sup>

<sup>1</sup> Division of Pharmacognosy, College of Pharmacy, Kyung Hee University, Seoul 02447, Korea; mindung3@khu.ac.kr

<sup>2</sup> Department of Life and Nanopharmaceutical Sciences, Graduate School, Kyung Hee University, Seoul 02447, Korea; ginapark0326@khu.ac.kr (G.P.); j5620242@naver.com (Y.J.)

<sup>3</sup> Department of Biomedical and Pharmaceutical Sciences, Graduate School, Kyung Hee University, Seoul 02447, Korea; dbsry3733@khu.ac.kr (Y.-G.L.); alstlr7595@khu.ac.kr (M.C.); 2021310688@khu.ac.kr (S.-H.G.)

<sup>4</sup> Central Research Center, Mtherapharma Co., Seoul 07793, Korea; mwson2020@mtherapharma.com

<sup>5</sup> Department of Oriental Pharmaceutical Science, College of Pharmacy, Kyung Hee University, Seoul 02447, Korea

\* Correspondence: ypyang@khu.ac.kr; Tel.: +82-2-961-9421

**Table S1.** List of *D. genkwa* buds or flowers from DG-A-S1-2019 to DG-L-S3-2019: DG, *Daphne genkwa*; S1 (stage 1, juvenile bud); S2 (stage 2, mature purple bud); S3 (stage 3, complete flowering).

| Voucher Specimen | Tag of Species | Geographical Information       | Height of Species (cm) |
|------------------|----------------|--------------------------------|------------------------|
| DG-A-S1-2019     | A              | Seoul                          | 45                     |
| DG-A-S2-2019     | A              | Seoul                          | 45                     |
| DG-A-S3-2019     | A              | Seoul                          | 45                     |
| DG-B-S1-2019     | B              | Seoul                          | 55                     |
| DG-B-S2-2019     | B              | Seoul                          | 55                     |
| DG-B-S3-2019     | B              | Seoul                          | 55                     |
| DG-C-S1-2019     | C              | Seoul                          | 80                     |
| DG-C-S2-2019     | C              | Seoul                          | 80                     |
| DG-C-S3-2019     | C              | Seoul                          | 80                     |
| DG-D-S1-2019     | D              | Seoul                          | 165                    |
| DG-D-S2-2019     | D              | Seoul                          | 165                    |
| DG-D-S3-2019     | D              | Seoul                          | 165                    |
| DG-E-S1-2019     | E              | Seoul                          | 120                    |
| DG-E-S2-2019     | E              | Seoul                          | 120                    |
| DG-E-S3-2019     | E              | Seoul                          | 120                    |
| DG-F-S1-2019     | F              | Suncheon-si, Jeollanam-do      | 110                    |
| DG-F-S2-2019     | F              | Suncheon-si, Jeollanam-do      | 110                    |
| DG-F-S3-2019     | F              | Suncheon-si, Jeollanam-do      | 110                    |
| DG-G-S1-2019     | G              | Suncheon-si, Jeollanam-do      | 90                     |
| DG-G-S2-2019     | G              | Suncheon-si, Jeollanam-do      | 90                     |
| DG-G-S3-2019     | G              | Suncheon-si, Jeollanam-do      | 90                     |
| DG-H-S1-2019     | H              | Geumsan-gun, Chungcheongnam-do | 70                     |
| DG-H-S2-2019     | H              | Geumsan-gun, Chungcheongnam-do | 70                     |
| DG-H-S3-2019     | H              | Geumsan-gun, Chungcheongnam-do | 70                     |
| DG-I-S1-2019     | I              | Geumsan-gun, Chungcheongnam-do | 70                     |
| DG-I-S2-2019     | I              | Geumsan-gun, Chungcheongnam-do | 70                     |
| DG-I-S3-2019     | I              | Geumsan-gun, Chungcheongnam-do | 70                     |
| DG-J-S1-2019     | J              | Gwacheon-si, Gyeonggi-do       | 95                     |
| DG-J-S2-2019     | J              | Gwacheon-si, Gyeonggi-do       | 95                     |
| DG-J-S3-2019     | J              | Gwacheon-si, Gyeonggi-do       | 95                     |
| DG-K-S1-2019     | K              | Uiwang-si, Gyeonggi-do         | 100                    |
| DG-K-S2-2019     | K              | Uiwang-si, Gyeonggi-do         | 100                    |
| DG-K-S3-2019     | K              | Uiwang-si, Gyeonggi-do         | 100                    |
| DG-L-S1-2019     | L              | Gwangju                        | 80                     |
| DG-L-S2-2019     | L              | Gwangju                        | 80                     |
| DG-L-S3-2019     | L              | Gwangju                        | 80                     |

**Table S2.** Peak area of ea eleven flavonoids peak from DG-A-S1-2019 to DG-L-S3-2019.

| Sample ID    | Assigned Flavonoid Peaks* |       |        |         |         |        |       |        |       |        |         |
|--------------|---------------------------|-------|--------|---------|---------|--------|-------|--------|-------|--------|---------|
|              | 1                         | 2     | 3      | 4       | 5       | 6      | 7     | 8      | 9     | 10     | 11      |
| DG-A-S1-2019 | 77163                     | 85431 | 82908  | 3193462 | 362707  | 137628 | 12186 | 339165 | 8397  | 21179  | 1382699 |
| DG-A-S2-2019 | 76784                     | 89950 | 75115  | 4971039 | 459389  | 135236 | 8117  | 193527 | 8727  | 64858  | 1432844 |
| DG-A-S3-2019 | 33660                     | 54626 | 37902  | 3014824 | 119526  | 38117  | 6733  | 56031  | 24578 | 8604   | 813309  |
| DG-B-S1-2019 | 85442                     | 41961 | 81451  | 2476796 | 159436  | 57616  | 13434 | 258953 | 15539 | 180086 | 1379076 |
| DG-B-S2-2019 | 45956                     | 71253 | 47851  | 4584072 | 342663  | 53512  | 8610  | 137930 | 31119 | 13721  | 1427682 |
| DG-B-S3-2019 | 60161                     | 60508 | 95393  | 4343796 | 171438  | 119174 | 9835  | 71242  | 1449  | 17375  | 707592  |
| DG-C-S1-2019 | 60296                     | 52050 | 46338  | 1750414 | 240786  | 118281 | 13886 | 279229 | 13249 | 38174  | 1390602 |
| DG-C-S2-2019 | 79681                     | 72278 | 75005  | 3824241 | 267313  | 129355 | 14805 | 443575 | 22473 | 91747  | 1460682 |
| DG-C-S3-2019 | 48562                     | 54379 | 43914  | 3072650 | 98006   | 35137  | 12204 | 141915 | 11862 | 20342  | 1286115 |
| DG-D-S1-2019 | 67870                     | 31406 | 80072  | 1621191 | 341221  | 156451 | 17760 | 458865 | 16839 | 139030 | 1385041 |
| DG-D-S2-2019 | 69742                     | 89111 | 79031  | 5100222 | 385546  | 132379 | 10629 | 240943 | 7095  | 34488  | 1834146 |
| DG-D-S3-2019 | 42775                     | 74878 | 58752  | 4726585 | 293439  | 82035  | 5800  | 67661  | 3144  | 16894  | 1353969 |
| DG-E-S1-2019 | 72979                     | 33770 | 86099  | 1743216 | 366904  | 168227 | 19097 | 493403 | 18106 | 149495 | 1489291 |
| DG-E-S2-2019 | 63691                     | 81380 | 72174  | 4657737 | 352097  | 120894 | 9707  | 220039 | 6479  | 31496  | 1675019 |
| DG-E-S3-2019 | 45222                     | 57015 | 33404  | 3320996 | 154550  | 59755  | 5909  | 81816  | 9479  | 13161  | 1014912 |
| DG-F-S1-2019 | 26971                     | 27266 | 77285  | 705971  | 639910  | 149848 | 8944  | 230976 | 8534  | 53093  | 334988  |
| DG-F-S2-2019 | 70657                     | 71103 | 92489  | 2971066 | 907866  | 136594 | 6287  | 128652 | 6777  | 47993  | 1046667 |
| DG-F-S3-2019 | 22221                     | 54363 | 72428  | 2433938 | 589733  | 101064 | 3147  | 98747  | 4979  | 29212  | 705446  |
| DG-G-S1-2019 | 49865                     | 68573 | 81655  | 737373  | 254861  | 34800  | 8830  | 170921 | 41041 | 154155 | 1123572 |
| DG-G-S2-2019 | 42119                     | 23623 | 111905 | 2425207 | 641194  | 96038  | 5280  | 180622 | 20196 | 97467  | 1874281 |
| DG-G-S3-2019 | 22814                     | 27684 | 121547 | 2278013 | 422659  | 48793  | 4778  | 116521 | 13295 | 91499  | 1410017 |
| DG-H-S1-2019 | 38226                     | 45374 | 106303 | 602395  | 896646  | 180089 | 7225  | 256171 | 3822  | 3284   | 130896  |
| DG-H-S2-2019 | 52294                     | 37626 | 56473  | 1639391 | 634508  | 155563 | 8141  | 284848 | 12752 | 13972  | 542717  |
| DG-H-S3-2019 | 10692                     | 0     | 42554  | 1458290 | 549548  | 117313 | 8383  | 169494 | 12617 | 6721   | 273544  |
| DG-I-S1-2019 | 37237                     | 22491 | 99965  | 821118  | 1028716 | 185293 | 11714 | 369584 | 9104  | 11559  | 269580  |
| DG-I-S2-2019 | 51022                     | 98690 | 68660  | 3389983 | 861096  | 181893 | 7031  | 324967 | 31074 | 31246  | 1725239 |
| DG-I-S3-2019 | 8854                      | 42747 | 44934  | 2063535 | 904957  | 104405 | 9085  | 272725 | 13275 | 9999   | 626736  |
| DG-J-S1-2019 | 42764                     | 49330 | 54147  | 629446  | 896051  | 105254 | 6599  | 391449 | 35659 | 42006  | 497337  |
| DG-J-S2-2019 | 23696                     | 68735 | 50071  | 2673043 | 997211  | 198193 | 8168  | 325735 | 31409 | 18298  | 1564767 |
| DG-J-S3-2019 | 8882                      | 33245 | 33250  | 2589242 | 546008  | 130785 | 5965  | 206743 | 18653 | 8772   | 883144  |
| DG-K-S1-2019 | 39343                     | 45384 | 49815  | 579090  | 824367  | 98834  | 6071  | 360133 | 32806 | 39446  | 463550  |
| DG-K-S2-2019 | 48279                     | 25353 | 183317 | 4308864 | 1449389 | 789200 | 5341  | 218996 | 3312  | 4675   | 1458181 |
| DG-K-S3-2019 | 23671                     | 24098 | 144144 | 3299982 | 1531842 | 657659 | 4257  | 89629  | 2820  | 4851   | 510851  |
| DG-L-S1-2019 | 41662                     | 47752 | 79642  | 802740  | 782988  | 161337 | 7861  | 285214 | 19076 | 36635  | 731048  |
| DG-L-S2-2019 | 43600                     | 97777 | 76273  | 2996132 | 514508  | 131059 | 11308 | 274059 | 18765 | 28735  | 1421713 |
| DG-L-S3-2019 | 10940                     | 50874 | 71696  | 2187139 | 777261  | 143418 | 8979  | 195782 | 12584 | 25481  | 1259319 |

\* 1; apigenin 5-*O*-glucoside, 2; apigenin 7-*O*-glucoside, 3; yuanhuanin, 4; apigenin 7-*O*-glucuronide, 5; genkwanin 5-*O*-primeveroside, 6; genkwanin 5-*O*-glucoside, 7; genkwanin 4'-*O*-rutinoside, 8; tiliroside, 9; apigenin, 10; 3'-hydroxygenkwanin, 11; genkwanin.
